# Supplementary material
Source: PubMed Central journal article supplement (PMC8171356)
Supplement: NIHMS1707286-supplement-SI.pdf [file NIHMS1707286-supplement-SI.pdf]

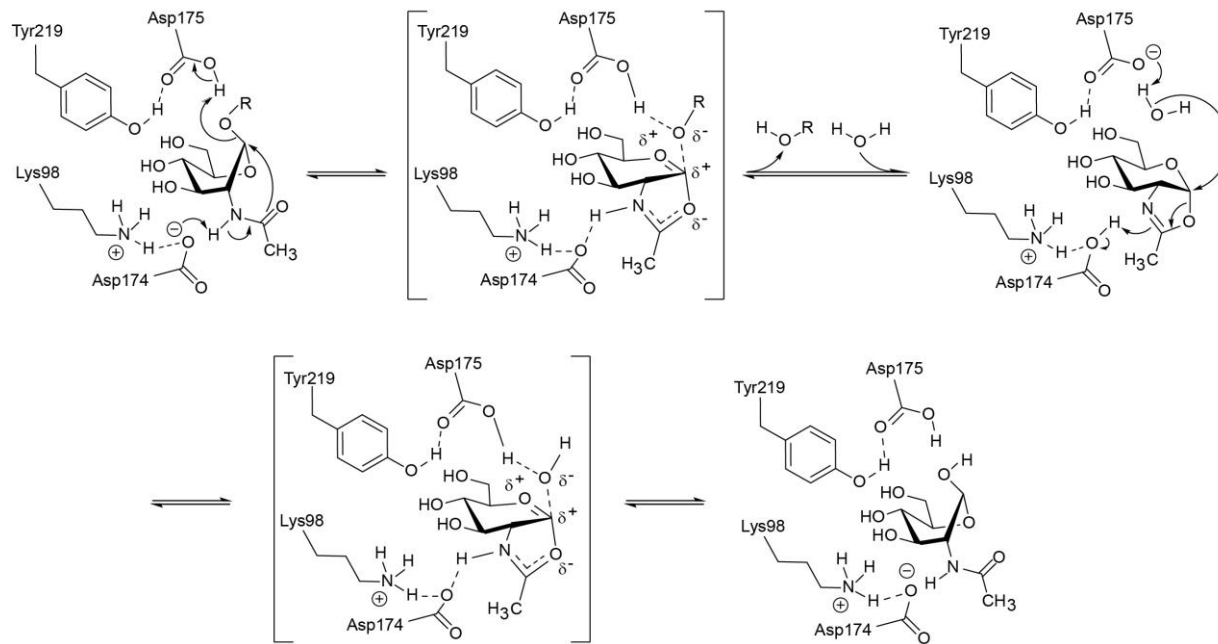

### Supplementary Figure 1

Substrate-assisted mechanism of OGA.

OGA-catalyzed hydrolysis of O-GlcNAcylation via a substrate-assisted mechanism, adapted from a previous report (Dennis, R. J. *et al.*, *Nat. Struct. Mol. Biol.* **13**, 365–371, 2006). The roles of ancillary residues Lys98 and Tyr219 are inferred from the crystal structure of OGA<sub>cryst</sub>-thiamet-G from this study.

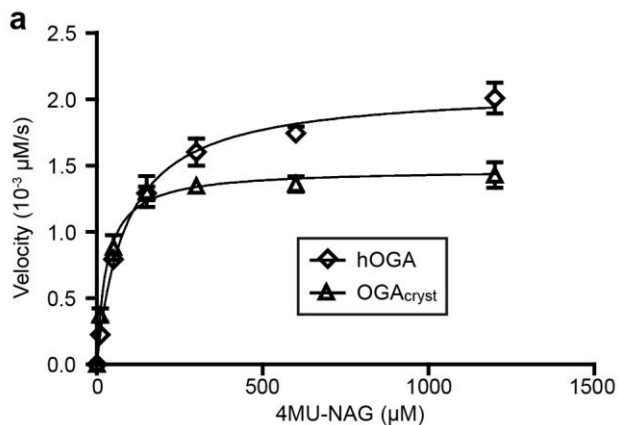

**b**

| Kinetic constants                                             | hOGA             | OGA <sub>cryst</sub> |
|---------------------------------------------------------------|------------------|----------------------|
| $K_m$ ( $\mu\text{M}$ 4MU-NAG)                                | $87.57 \pm 6.91$ | $29.68 \pm 3.37$     |
| $k_{\text{cat}}$ ( $\text{min}^{-1}$ )                        | $62.35 \pm 0.02$ | $44.09 \pm 0.02$     |
| $k_{\text{cat}} / K_m$ ( $\text{min}^{-1} \mu\text{M}^{-1}$ ) | $0.71 \pm 0.06$  | $1.48 \pm 0.19$      |

### Supplementary Figure 2

Kinetic parameters of hOGA and OGA<sub>cryst</sub> proteins.

(a) Michaelis–Menten plots of hOGA and OGA<sub>cryst</sub> with varying concentrations of 4MU-NAG. Data were fitted using GraphPad Prism. Error bars represent s.d. values derived from three independent experiments. (b) Summary of the kinetic parameters of hOGA and OGA<sub>cryst</sub>. The  $K_m$  and  $k_{\text{cat}}$  were determined from three independent experiments and displayed as average  $\pm$  s.d..

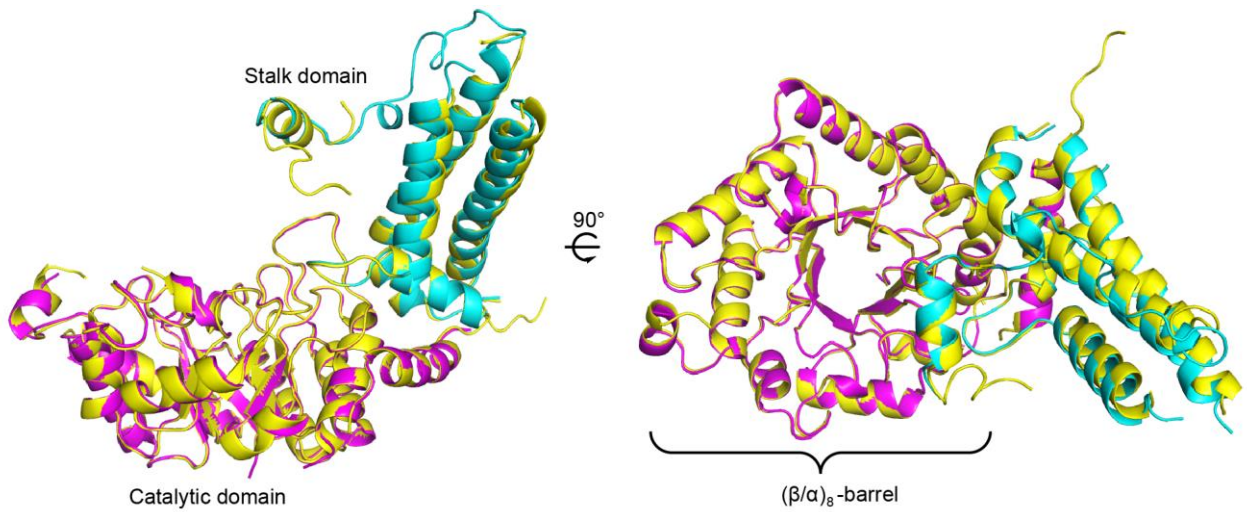

### Supplementary Figure 3

Structural comparison of the two sister monomers of OGA<sub>cryst</sub>.

Two perpendicular views of superimposed OGA $\alpha$  and OGA $\beta$  reveal that the catalytic domains are folded into an identical ( $\beta/\alpha$ )<sub>8</sub>-barrel, while the stalk domains display a slight variation. OGA $\alpha$  is colored yellow; the catalytic domain and stalk domain of OGA $\beta$  are colored magenta and cyan, respectively.

**a**

|                           |     |                                                                                                                                                                                                                                                                                 |
|---------------------------|-----|---------------------------------------------------------------------------------------------------------------------------------------------------------------------------------------------------------------------------------------------------------------------------------|
| Homo_sapiens              | 367 | DIETDVLYSQMALKKLALTEWLQEFVPHQYSSRQVAHSGAKASVVDGTPLVAAPSLNATTVVTTVYQEP                                                                                                                                                                                                           |
| Oceanicola_granulosus     |     | .....                                                                                                                                                                                                                                                                           |
| Bacteroides_thetaiotaomic |     | .....                                                                                                                                                                                                                                                                           |
| Clostridium_perfringens   |     | .....                                                                                                                                                                                                                                                                           |
| Thermobaculum_terrenum    |     | .....                                                                                                                                                                                                                                                                           |
|                           |     |                                                                                                                                                                                                                                                                                 |
| Homo_sapiens              | 437 | IMSQGAALSCEPTTLTKEEKKQPDEEPMVMVVEKQEETDCHKNDNQILSEIVEAKMAEELKPMDDTKESI                                                                                                                                                                                                          |
| Oceanicola_granulosus     |     | .....                                                                                                                                                                                                                                                                           |
| Bacteroides_thetaiotaomic |     | .....                                                                                                                                                                                                                                                                           |
| Clostridium_perfringens   |     | .....                                                                                                                                                                                                                                                                           |
| Thermobaculum_terrenum    |     | .....                                                                                                                                                                                                                                                                           |
|                           |     |                                                                                                                                                                                                                                                                                 |
| Homo_sapiens              | 507 | AESKSPEMSQEDCISDIAPMQTDEQTNKEQFVPGPNEKP <sup>Y</sup> Y <sup>T</sup> AEPVT.....                                                                                                                                                                                                  |
| Oceanicola_granulosus     | 275 | ...DPDYAPERAI <sup>A</sup> AAVA... <sup>A</sup> WQPRFRL <sup>A</sup> F <sup>C</sup> DGAVP.....                                                                                                                                                                                  |
| Bacteroides_thetaiotaomic | 416 | ...AKYDTWQT <sup>W</sup> KDAIRT <sup>I</sup> L <sup>F</sup> SAAEE.LECFAMHN...SDLGPNCHGYR                                                                                                                                                                                        |
| Clostridium_perfringens   | 454 | ...YDYDKA <sup>W</sup> NRAIDM <sup>L</sup> Y <sup>C</sup> DLAED.MKVFANHS...TRMDNKTWAKS                                                                                                                                                                                          |
| Thermobaculum_terrenum    | 282 | ...YNPQDS <sup>W</sup> RQAVST <sup>L</sup> L <sup>C</sup> EDNLSAMEKFPYQNTISCLPEPEP...                                                                                                                                                                                           |
|                           |     |                                                                                                                                                                                                                                                                                 |
| Homo_sapiens              | 555 | ...LED <sup>L</sup> Q <sup>L</sup> T <sup>A</sup> D <sup>L</sup> F <sup>Y</sup> LPYEHGPKGAC <sup>M</sup> LREFQWLRANSSVVS <sup>V</sup> N <sup>C</sup> K <sup>G</sup> K <sup>D</sup> SEKIE <sup>E</sup> WRSRAAK <sup>F</sup> E <sup>R</sup> MCGL                                  |
| Oceanicola_granulosus     | 306 | ...SDLVAL <sup>L</sup> C <sup>D</sup> L <sup>F</sup> WQPFALGPETTR <sup>L</sup> LSALRAA...LT...VPRPDPSPAWRAALED <sup>L</sup> R <sup>D</sup> LKRR                                                                                                                                 |
| Bacteroides_thetaiotaomic | 458 | ...REESMD <sup>L</sup> Q <sup>P</sup> A <sup>E</sup> R <sup>F</sup> LKAFKEGK <sup>N</sup> YDKA...DFET...                                                                                                                                                                        |
| Clostridium_perfringens   | 494 | GREDAPE <sup>L</sup> RAK <sup>M</sup> DEL <sup>L</sup> WNKLS.SKEDASA...LIE <sup>E</sup> ...                                                                                                                                                                                     |
| Thermobaculum_terrenum    | 322 | ...LAY <sup>L</sup> T <sup>N</sup> L <sup>F</sup> KK.VQ...ED...FASFRFE...QGLRTL <sup>R</sup> E <sup>E</sup> IIS                                                                                                                                                                 |
|                           |     |                                                                                                                                                                                                                                                                                 |
| Homo_sapiens              | 621 | <sup>Y</sup> MGM <sup>F</sup> <sup>T</sup> R <sup>L</sup> SNCA...NRT <sup>I</sup> L <sup>Y</sup> DMYS <sup>Y</sup> Y <sup>W</sup> DIK <sup>S</sup> IMS <sup>M</sup> VK <sup>S</sup> F <sup>V</sup> QW <sup>L</sup> GCR <sup>S</sup> HSS <sup>A</sup> QFLIGD <sup>O</sup> EPWAFR |
| Oceanicola_granulosus     | 363 | <sup>I</sup> NK <sup>L</sup> F <sup>T</sup> L <sup>M</sup> TEIE...NRD <sup>L</sup> F <sup>H</sup> TFHN <sup>Y</sup> I <sup>W</sup> EAEQEVGHLVAYCDWLDEAPP <sup>P</sup> GA <sup>V</sup> FPATDRIHNFYR                                                                              |
| Bacteroides_thetaiotaomic | 489 | <sup>L</sup> Q <sup>Y</sup> T <sup>F</sup> ER <sup>M</sup> KESADILLMN <sup>T</sup> ENK <sup>P</sup> LIVEITP <sup>W</sup> Y <sup>H</sup> QPKLTAEMGEEV...LKMVEGRNESYFLR                                                                                                           |
| Clostridium_perfringens   | 528 | <sup>L</sup> YGE <sup>F</sup> AR <sup>M</sup> E <sup>E</sup> ACNNLKANLPEVA <sup>L</sup> ...EECSRO...LDEL...ITL <sup>A</sup> O <sup>G</sup> DKASLD...                                                                                                                            |
| Thermobaculum_terrenum    | 354 | <sup>M</sup> Q <sup>T</sup> T <sup>Y</sup> S <sup>R</sup> L <sup>S</sup> ...TQDSK <sup>F</sup> F <sup>W</sup> EIRP <sup>W</sup> I <sup>E</sup> EYK <sup>L</sup> WTD...YLD...QAM <sup>I</sup> T <sup>F</sup> S...NLFT                                                            |
|                           |     |                                                                                                                                                                                                                                                                                 |
| Homo_sapiens              | 683 | GGLAG...EFOR <sup>L</sup> ...PIDGAND <sup>F</sup> FFQPP.....                                                                                                                                                                                                                    |
| Oceanicola_granulosus     | 425 | RGF <sup>G</sup> V...AVQD <sup>L</sup> ...QRDRQGR <sup>Y</sup> HHGV.....                                                                                                                                                                                                        |
| Bacteroides_thetaiotaomic | 548 | KYNHVKALQOQ <sup>M</sup> FYIDQTSNQN <sup>P</sup> YQPGVKTAT...RVIKPLIDRIFATVVV <sup>K</sup> FFN <sup>Q</sup> KFN <sup>A</sup> HLDA                                                                                                                                               |
| Clostridium_perfringens   | 571 | ...MIVAQLNEDTEA <sup>Y</sup> ESAKEIAQNKLN <sup>T</sup> ALSSFAVI <sup>S</sup> EKVAQSF <sup>I</sup> Q <sup>E</sup> ALSFD <sup>L</sup> TL...                                                                                                                                       |
| Thermobaculum_terrenum    | 399 | GFPTADEEQAR <sup>R</sup> SLQKALQ <sup>C</sup> .RT <sup>V</sup> LREV...LKD <sup>A</sup> VDFR <sup>T</sup> RVCGD <sup>V</sup> VRN <sup>F</sup> LQ <sup>V</sup> VL <sup>R</sup> ST <sup>V</sup> SI...ELQA                                                                          |
|                           |     |                                                                                                                                                                                                                                                                                 |
| Homo_sapiens              |     | .....                                                                                                                                                                                                                                                                           |
| Oceanicola_granulosus     |     | .....                                                                                                                                                                                                                                                                           |
| Bacteroides_thetaiotaomic | 608 | TTD.....                                                                                                                                                                                                                                                                        |
| Clostridium_perfringens   | 624 | I.....                                                                                                                                                                                                                                                                          |
| Thermobaculum_terrenum    | 460 | E <sup>G</sup> K <sup>E</sup> W <sup>T</sup> A <sup>L</sup> P <sup>P</sup> G <sup>I</sup> V <sup>R</sup> D                                                                                                                                                                      |

**b**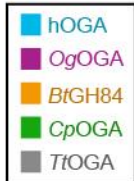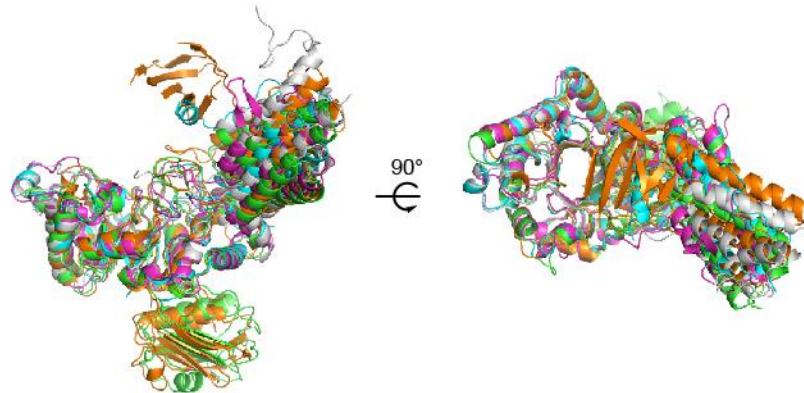**c**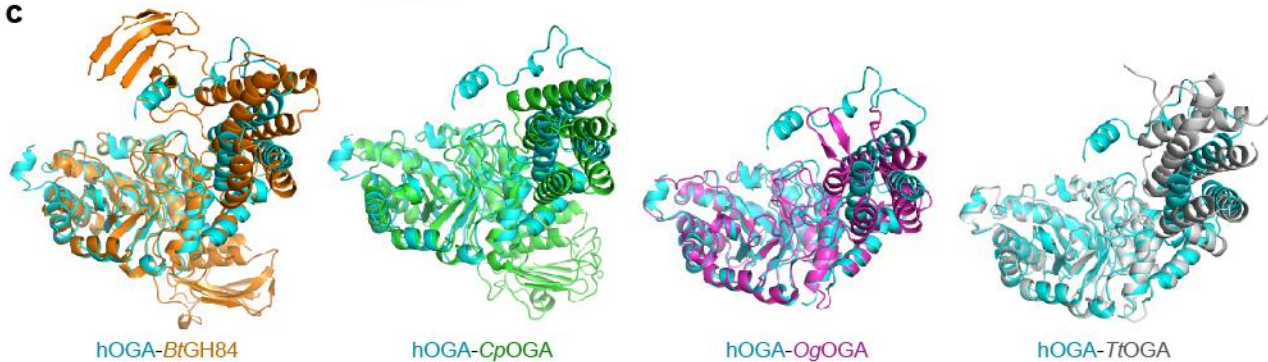



#### Supplementary Figure 4

The sequence and structure of the hOGA stalk domain are markedly different from those of its bacterial homologs.

(a) Sequence alignment and (b-c) structural comparison of the stalk domains of OGA proteins from human (hOGA, cyan) and representative bacterial species: *Oceanicola granulosus* (OgOGA, PDB: 2XSA, magenta) (Schimpl, M. *et al.*, *Biochem. J.* **432**, 1–7, 2010), *Bacteroides thetaiotaomicron* (BtGH84, PDB: 2CHO, orange) (Dennis, R. J. *et al.*, *Nat. Struct. Mol. Biol.* **13**, 365–371, 2006), *Clostridium perfringens* (CpOGA, PDB: 2CBJ, green) (Rao, F. V. *et al.*, *EMBO J.* **25**, 1569–1578, 2006) and *Thermobaculum terrenum* (TtOGA, PDB: 5DIY, grey) (Ostrowski, A., *et al.*, *J. Biol. Chem.* **290**, 30291–30305, 2015). In the sequence alignment, variable and similar residues are shown in black and red, respectively.

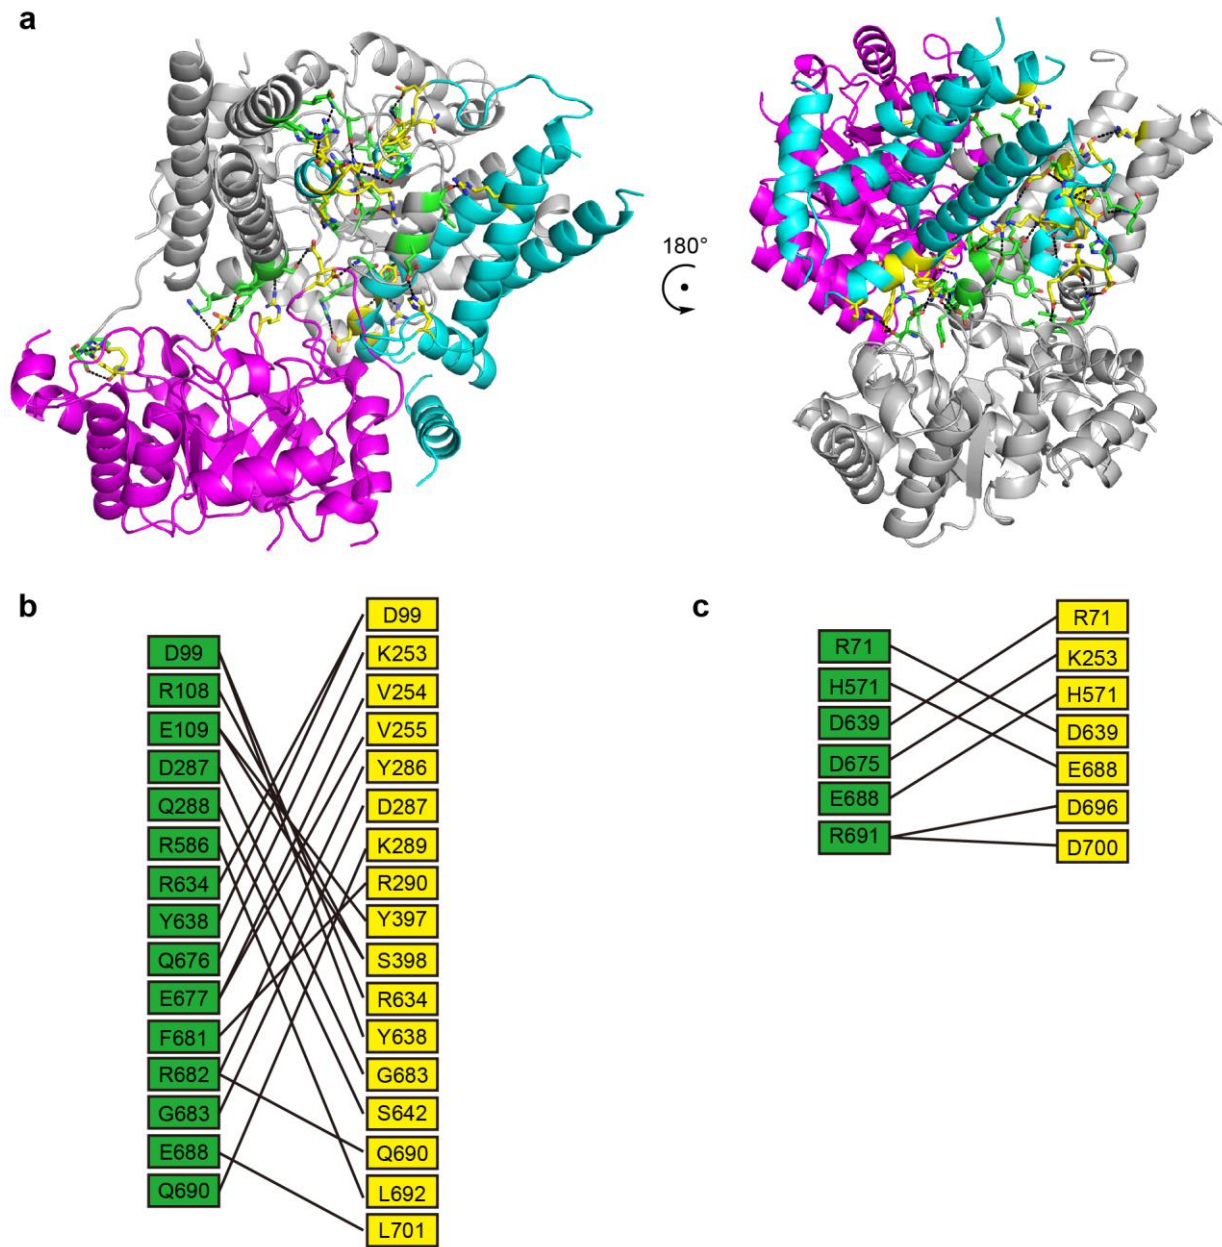

### Supplementary Figure 5

Extensive polar interactions stabilize the dimerization of OGA<sub>cryst</sub>.

(a) Two different views of OGA<sub>cryst</sub> with dimerization interface. OGA $\alpha$  is colored gray; the catalytic domain and stalk domain of OGA $\beta$  are colored magenta and cyan, respectively. (b) Schematic representation of the hydrogen bonds detected at the dimerization interface. (c) Schematic representation of the salt bridges detected at the dimerization interface. Residues from OGA $\alpha$  and OGA $\beta$  participating in the polar interactions are colored in yellow and green, respectively.

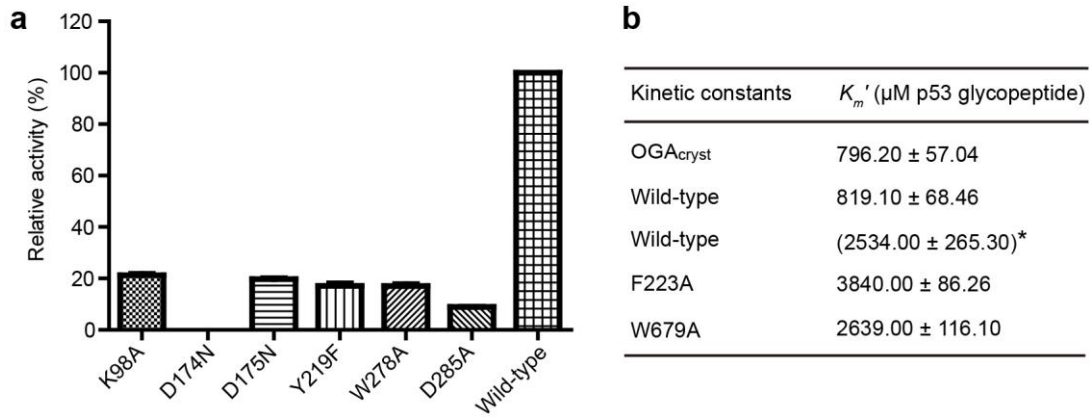

### Supplementary Figure 6

Relative activities and substrate-binding evaluation of hOGA variants.

(a) The activities of hOGA mutants were measured using 4MU-NAG and normalized to the wild-type enzyme. The error bars represent the s.d. values derived from three independent experiments. (b) To evaluate the contribution of hydrophobic interactions with the p53 glycopeptide (Ac-QLWVDS(O-GlcNAc)TPPPG), the Michaelis constants of hOGA and mutants were determined using 4MU-NAG as the reporter substrate following multisubstrate enzyme kinetics as shown previously (Schimpl, M. *et al.*, *Biochem. J.* **432**, 1–7, 2010; Schimpl, M. *et al.*, *Chem. Biol.* **19**, 173–178, 2012; Xie, D. *et al.*, *Protein Science* **8**, 2460–2464, 1999). \*The Michaelis constant of wild-type hOGA was measured towards a W(-3)A mutant of p53 glycopeptide (Ac-QLAVDS(O-GlcNAc)TPPPG) using a similar assay. The  $K_m'$  values were determined from three independent experiments and displayed as average  $\pm$  s.d..



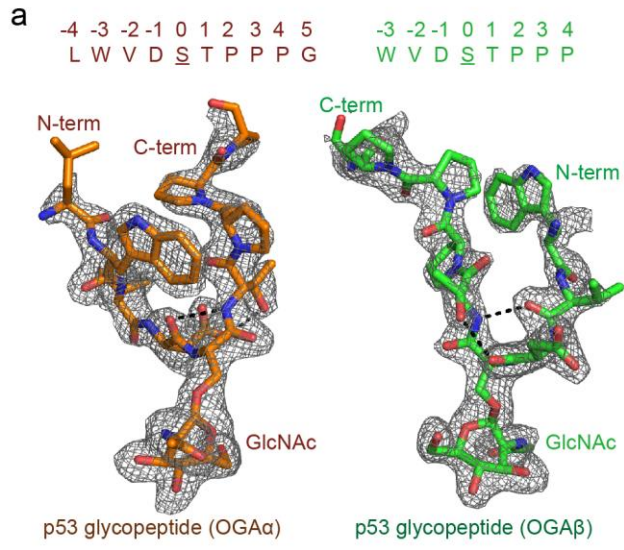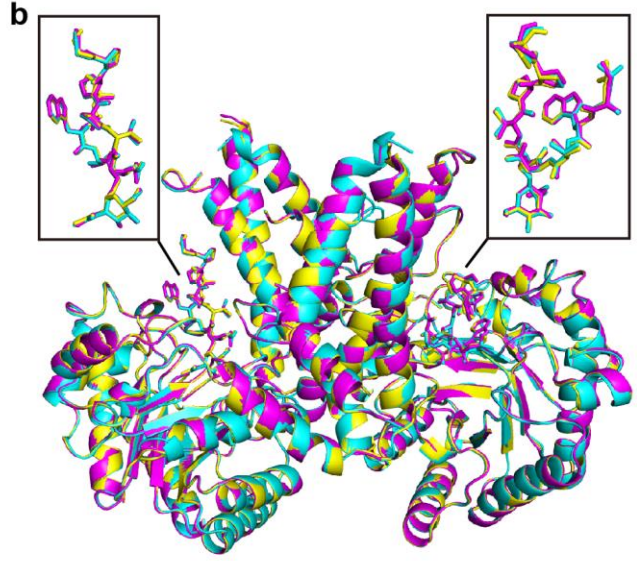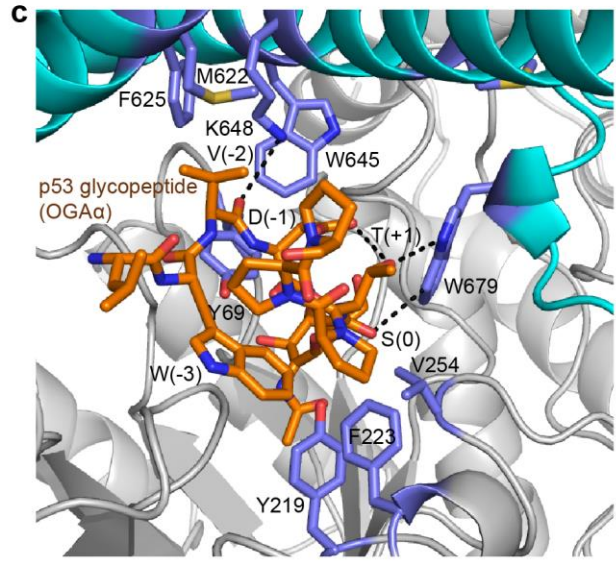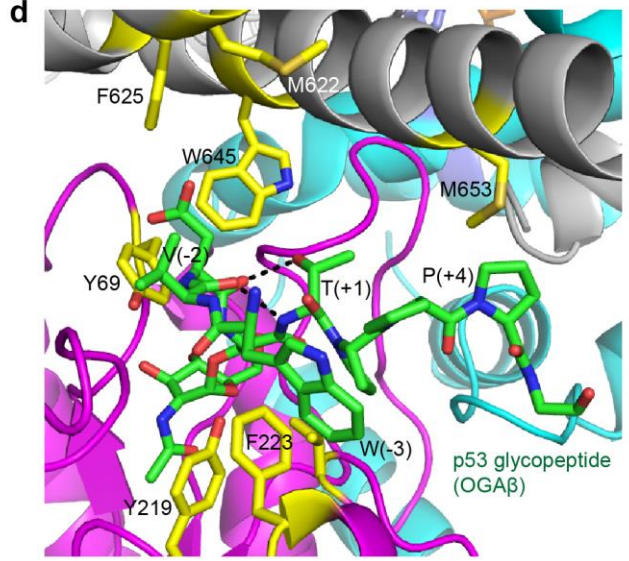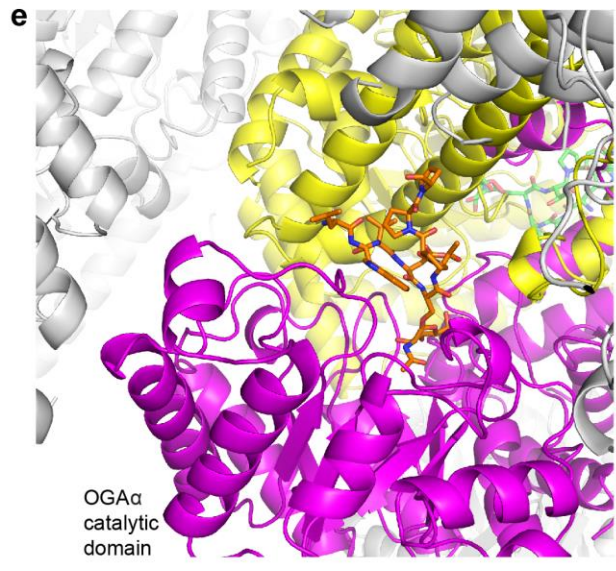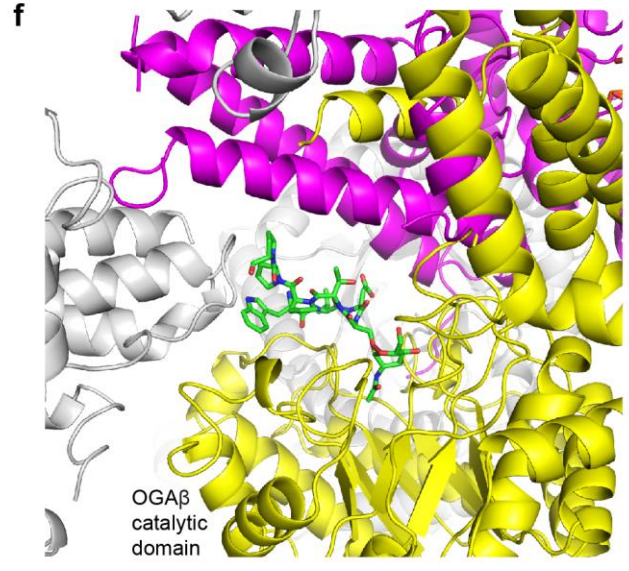

## Supplementary Figure 7

Binding conformation of p53 glycopeptides in the OGA<sub>cryst</sub>-p53 complex.

(a) *F<sub>o</sub>-F<sub>c</sub>* difference map of p53 glycopeptides from the OGA<sub>cryst</sub>-p53 complex (contoured at 3 $\sigma$ ). The peptides from OGA $\alpha$  and OGA $\beta$  are shown in orange and green sticks, respectively. Intramolecular hydrogen bonds are displayed as dotted lines. (b) Superposition of OGA<sub>cryst</sub>-p53 complex structures collected from three independent soaking experiments (inserts: enlarged p53 glycopeptides from each monomer. The p53 glycopeptides in the right insert have been rotated for better clarity). (c-d) Close-up views of the binding conformations of p53 glycopeptides in (c) OGA $\alpha$  and (d) OGA $\beta$ . Residues on the inner surface of the substrate-binding cleft that are in close vicinity of the peptide are highlighted in (c) blue sticks and (d) yellow sticks, respectively. Hydrogen bonds are displayed in dashed lines. (e-f) Crystal packing potentially contributes to stabilize p53 glycopeptide in OGA $\beta$  but not in OGA $\alpha$ . OGA $\alpha$  and OGA $\beta$  are shown in magenta and yellow, respectively. The symmetric molecule is shown in grey.



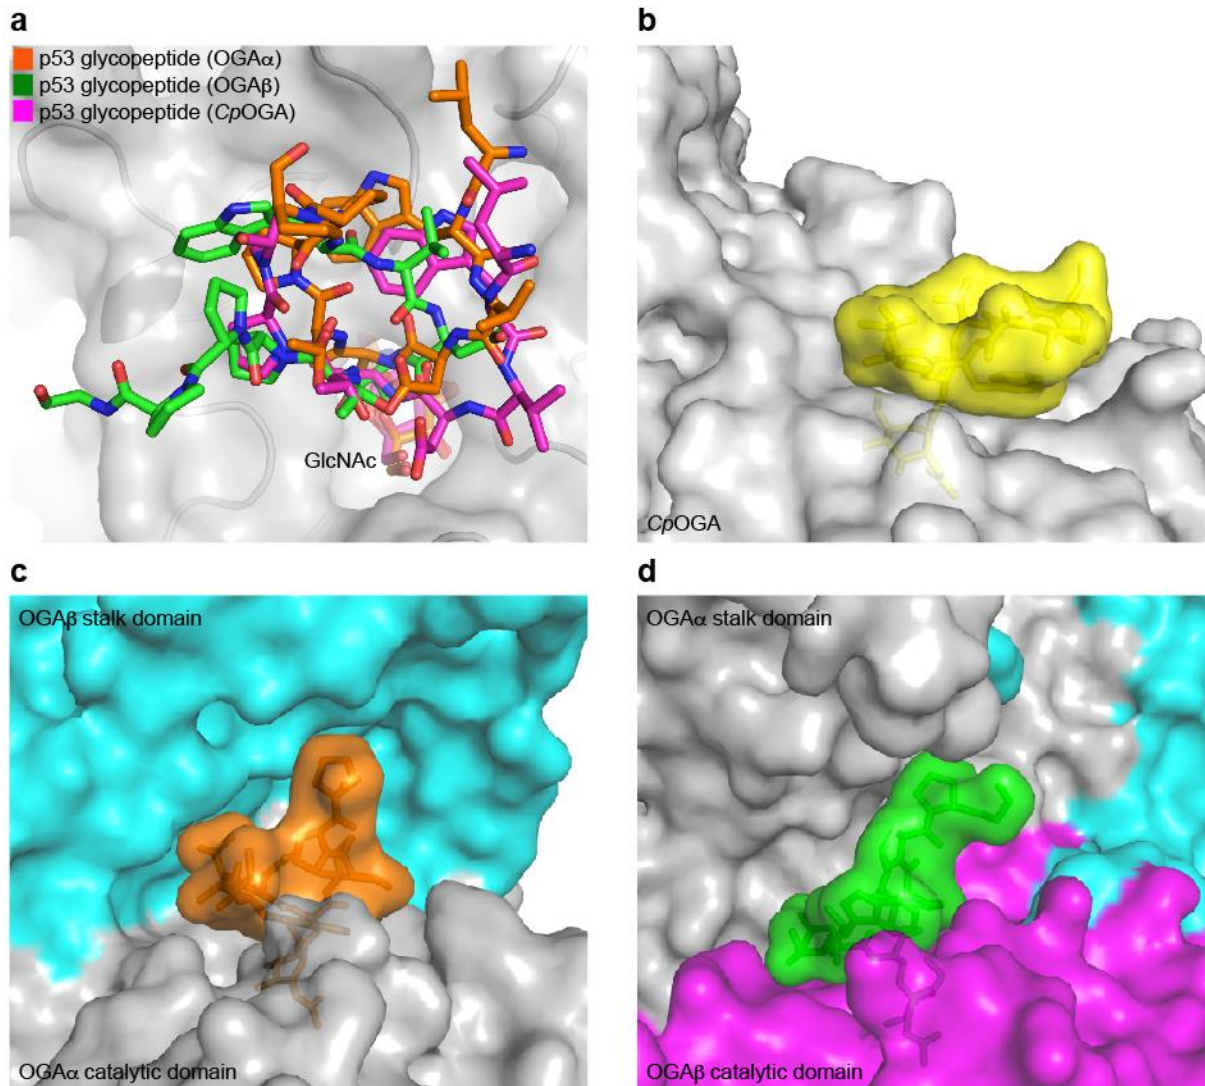

### Supplementary Figure 8

The p53 glycopeptide adopts distinct binding conformations in the structures of human and bacterial OGAs.

(a) Superposition of the p53 glycopeptide (stick representation) in the CpOGA–p53 complex (PDB: 2YDR) (Schimpl, M. *et al.*, *Chem. Biol.* **19**, 173–178, 2012) with those in the OGA<sub>cryst</sub>–p53 complex. (b) Surface representation of the CpOGA–p53 complex, highlighting the p53 glycopeptide (yellow) bound on top of the active site (PDB: 2YDR). (c) Surface representation of the p53 glycopeptide (orange) bound in the substrate-binding cleft that comprises the catalytic domain of OGA $\alpha$  (grey) and the stalk domain of OGA $\beta$  (cyan). (d) Surface representation of the p53 glycopeptide (green) bound in the substrate-binding cleft that comprises the stalk domain of OGA $\alpha$  (grey) and the catalytic domain of OGA $\beta$  (magenta). In b–d panels, stick presentation of p53 glycopeptides is displayed as semitransparent.

**a**

Homo\_sapiens 1 MVQKESQATLEERESELSNPAAASAGASLEFPAPAPGEDNPAGAGGAAVAGAAGGARFRFLCGVVECFYGL  
Rattus\_norvegicus 1 MVQKESQAALERESEERNANPASVGSASLEFPAPAPGEDNPAGAGGAAGTGAAGGARFRFLCGVVECFYGL  
Mus\_musculus 1 MVQKESQAALERESEERNANPAASAGASLEQSVAPAPGEDNPAGAGGAAVAGAAGGARFRFLCGVVECFYGL  
Caenorhabditis\_elegans 1 .....MECTESFDRRKAVQNSKYICGVVECFYGL  
Drosophila\_melanogaster 1 .....MADEAGSQADGKRFRFLCGVVECFYGL  
Ostrinia\_furnacalis 1 .....MTESSPDEFSRNRKDFICGVVECFYGL

Homo\_sapiens 71 RPWVMEQRKELFRRLQKWEIN...YIYAPKDDMKHRMFWREMYSVEEAEOLMTLTLAAREYEIEFIFYAI  
Rattus\_norvegicus 71 RPWVMEQRKELFRRLQKWEIN...YIYAPKDDMKHRMFWREMYSVEEAEOLMTLTLAAREYEIEFIFYAI  
Mus\_musculus 71 RPWVMEQRKELFRRLQKWEIN...YIYAPKDDMKHRMFWREMYSVEEAEOLMTLTLAAREYEIEFIFYAI  
Caenorhabditis\_elegans 29 RPWVMEQRKELFRRLQKWEIN...YIYAPKDDMKHRMFWREMYSVEEAEOLMTLTLAAREYEIEFIFYAI  
Drosophila\_melanogaster 26 RPWVMEQRKELFRRLQKWEIN...YIYAPKDDMKHRMFWREMYSVEEAEOLMTLTLAAREYEIEFIFYAI  
Ostrinia\_furnacalis 27 RPWVMEQRKELFRRLQKWEIN...YIYAPKDDMKHRMFWREMYSVEEAEOLMTLTLAAREYEIEFIFYAI

Homo\_sapiens 138 SPGCDITFSNPKFVSTLTKKRLQVSVFCGRSFAFLFDDIDHNMCAADKEVFSFAFAHQVSVITNIIYQYLG  
Rattus\_norvegicus 138 SPGCDITFSNPKFVSTLTKKRLQVSVFCGRSFAFLFDDIDHNMCAADKEVFSFAFAHQVSVITNIIYQYLG  
Mus\_musculus 138 SPGCDITFSNPKFVSTLTKKRLQVSVFCGRSFAFLFDDIDHNMCAADKEVFSFAFAHQVSVITNIIYQYLG  
Caenorhabditis\_elegans 96 SPGCDITFSNPKFVSTLTKKRLQVSVFCGRSFAFLFDDIDHNMCAADKEVFSFAFAHQVSVITNIIYQYLG  
Drosophila\_melanogaster 96 SPGCDITFSNPKFVSTLTKKRLQVSVFCGRSFAFLFDDIDHNMCAADKEVFSFAFAHQVSVITNIIYQYLG  
Ostrinia\_furnacalis 94 SPGCDITFSNPKFVSTLTKKRLQVSVFCGRSFAFLFDDIDHNMCAADKEVFSFAFAHQVSVITNIIYQYLG

Homo\_sapiens 208 EPEFLFCPTCYCGTFCYVNVQSPYLRTVGEKLLPGLTEVIVTGTGPKVSKETPVESTIEVSKTIKRAPVI  
Rattus\_norvegicus 208 EPEFLFCPTCYCGTFCYVNVQSPYLRTVGEKLLPGLTEVIVTGTGPKVSKETPVESTIEVSKTIKRAPVI  
Mus\_musculus 208 EPEFLFCPTCYCGTFCYVNVQSPYLRTVGEKLLPGLTEVIVTGTGPKVSKETPVESTIEVSKTIKRAPVI  
Caenorhabditis\_elegans 166 TK.TFMRCPTCYCGTFCYVNVQSPYLRTVGEKLLPGLTEVIVTGTGPKVSKETPVESTIEVSKTIKRAPVI  
Drosophila\_melanogaster 166 SP.FRLFCPTCYCGTFCYVNVQSPYLRTVGEKLLPGLTEVIVTGTGPKVSKETPVESTIEVSKTIKRAPVI  
Ostrinia\_furnacalis 164 CP.FRLFCPTCYCGTFCYVNVQSPYLRTVGEKLLPGLTEVIVTGTGPKVSKETPVESTIEVSKTIKRAPVI

Homo\_sapiens 278 WDNHANDYDKRRIFLCPYKGRSTELIPLRKGVLITNPNCEFEANVVAIHTLTLWYKSNMNGVRKDVMTD  
Rattus\_norvegicus 278 WDNHANDYDKRRIFLCPYKGRSTELIPLRKGVLITNPNCEFEANVVAIHTLTLWYKSNMNGVRKDVMTD  
Mus\_musculus 278 WDNHANDYDKRRIFLCPYKGRSTELIPLRKGVLITNPNCEFEANVVAIHTLTLWYKSNMNGVRKDVMTD  
Caenorhabditis\_elegans 235 WDNHANDYDKRRIFLCPYKGRSTELIPLRKGVLITNPNCEFEANVVAIHTLTLWYKSNMNGVRKDVMTD  
Drosophila\_melanogaster 235 WDNHANDYDKRRIFLCPYKGRSTELIPLRKGVLITNPNCEFEANVVAIHTLTLWYKSNMNGVRKDVMTD  
Ostrinia\_furnacalis 233 WDNHANDYDKRRIFLCPYKGRSTELIPLRKGVLITNPNCEFEANVVAIHTLTLWYKSNMNGVRKDVMTD

Homo\_sapiens 348 SEDSTVSIQIKLENEG...SDEDI...ETDVLVYSPQMAKLLAETWIEQEBGVPHQYSRQVAHS  
Rattus\_norvegicus 348 SEDSTVSIQIKLENEG...SDEDI...ETDVLVYSPQMAKLLAETWIEQEBGVPHQYSRQVAHS  
Mus\_musculus 348 SEDSTVSIQIKLENEG...SDEDI...ETDVLVYSPQMAKLLAETWIEQEBGVPHQYSRQVAHS  
Caenorhabditis\_elegans 302 ..EALVLAIRKTTSD ESGISSRNGV.LNIDCNTETIYVPEVSVNVAVSTWIDEBITPVSVAQV...  
Drosophila\_melanogaster 298 .NS.SLSADIKLETEN...DDD...LPAEFLSKNVYHFRLATKNAETWIEQEBGVPHQYSRQVAHS  
Ostrinia\_furnacalis 296 .HMEAVSWDIRLEREG...EGGVCEDEAPLPLGKHVYHRRQALREANENWIEQEBGVPHQYSRQVAHS

Homo\_sapiens 406 GA.KASVVDGTFVLV...AAPS LNAT...TVVT.TVYQEPFIMSQGA  
Rattus\_norvegicus 406 GA.KTSVVDGTFVLV...AAPS LNAT...TVVT.TVYQEPFIMSQGA  
Mus\_musculus 406 GA.KTSVVDGTFVLV...AAPS LNAT...TVVT.TVYQEPFIMSQGA  
Caenorhabditis\_elegans 364 PPQL.TADVAGYVDRRCVLLDLPETHG...VIRPEVPMVAEII  
Drosophila\_melanogaster 357 PQVQM.VMPIIPIIPVINTCMVLTITTTST...SRTVPTVNTIQLQALADVCVVT...  
Ostrinia\_furnacalis 360 PPIVIPPVPIIPIIPVINTCMVLTITTTST...SRTVPTVNTIQLQALADVCVVT...LIIATGI

Homo\_sapiens 443 ALS...GEFTIT...KEEEKKQDDEEPM...  
Rattus\_norvegicus 443 ALS...GEPSALT...KEEEKKQDDEEPM...  
Mus\_musculus 443 ALS...GEPSALT...KEEEKKQDDEEPM...  
Caenorhabditis\_elegans 405 A...TENIIOSAVAPPEPVPSLNS...  
Drosophila\_melanogaster 412 ...SLTPISNPVMNSLVSPTKVIITNDIINPPTTAASNIELKKIIPHSVVPVPMETKSVSEASVELAL  
Ostrinia\_furnacalis 430 SPNETFNPVANPVMNSLVSPTKVIITNDIINPPTTAASNIELSEIPLHSVVPVPMETKSVSEASVELAL

Homo\_sapiens 467 ...MVVEKQEEEDHKNQI...SEIVEAKMAEEKPM...  
Rattus\_norvegicus 467 ...MVVEKQEESEHKSNDQILTEIVEAKMAEEKPM...  
Mus\_musculus 467 ...MVVEKQEEAEHKNQI...SEIVEAKMAEEKPM...  
Caenorhabditis\_elegans 427 ...LAA...EYSPMTE...  
Drosophila\_melanogaster 478 DNAVFDNIEIPNSDSVVKERLELVNLEEGKQEPVANLSVDTMLDDD...SLSPLSGVNVNE...  
Ostrinia\_furnacalis 500 S..MIEKADETLSGDSVLESASEIEDMKKDKDDTDTNIVD...DMFELVGETQRNGEMSLGDT

Homo\_sapiens 505 ...SIA...ESKSPFEMSMQEDCI...NDIAPMOTDEQ...TNKEQFVPGP  
Rattus\_norvegicus 505 ...SIA...ESKSPFEMSMQEDCI...NDIAPMOTDEQ...ANKEQFVPGP  
Mus\_musculus 505 ...SMA...PDVAPMOTDEQ...TQKEQFVPGP  
Caenorhabditis\_elegans 439 ...DPEVSEQDESM...VSVDEDSAPVPLGLAT...  
Drosophila\_melanogaster 535 PMECSSTITSQVSPREEEAIK...VVAADVLMESVNDVHSMHVESGTSSPISNAEMREBTE.AQSDRT  
Ostrinia\_furnacalis 559 PQTLSPERGS LFAPPEPEPGIMEAAEGDVCVNDGMSENGSMQVEPS.NSPLSTDMVEMTEPEVPEVDET

Homo\_sapiens 543 NEKPLYTAEPVTLLEDLQLLADLFYLPYEREGPKCAQMLREFSWLRANSVSVVSNVC...KGDSEKI  
Rattus\_norvegicus 543 NEKPLYTAEPVTLLEDLQLLADLFYLPYEREGPKCAQMLREFSWLRANSVSVVSNVC...KGDSEKI  
Mus\_musculus 543 NEKPLYTAEPVTLLEDLQLLADLFYLPYEREGPKCAQMLREFSWLRANSVSVVSNVC...KGDSEKI  
Caenorhabditis\_elegans 468 ...TAEBEIRNQLSLLCATCEMYVLPYEREGPKCAQMLREFSWLRANSVSVVSNVC...EETLDPLO  
Drosophila\_melanogaster 599 NNNTIEGEGITVDDLVLLCLDFYLPYEREGPKCAQMLREFSWLRANSVSVVSNVC...EETLDPLO  
Ostrinia\_furnacalis 628 LEEPTVDENALIIDDLVLLCLDFYLPYEREGPKCAQMLREFSWLRANSVSVVSNVC...QPRGNKPEP

Homo\_sapiens 605 EWRSRRAKFEEMCGLVGCMFTRLSNCANRTILYDMYSYVVDIKSITMSVKSFWQLGCRSHS...  
Rattus\_norvegicus 605 EWRSRRAKFEEMCALVMGMPFTRLSNCANRTILYDMYSYVVDIKSITMSVKSFWQLGCRSHS...  
Mus\_musculus 605 EWRSRRAKFEEMCALVMGMPFTRLSNCANRTILYDMYSYVVDIKSITMSVKSFWQLGCRSHS...  
Caenorhabditis\_elegans 529 SEWLVKYDGVNEFLTASIDSFPIITQAPNKAILSEIVPYADDAHSCCVLLIARVMMQGNALDNPENNL  
Drosophila\_melanogaster 669 SEWLRREKQFDQLCSAVRLLKIANCPNKEICHELSEYMAADISGALSLLNLYVQWLLALGHFPQNTSSYT  
Ostrinia\_furnacalis 687 SEWLRRRSRFAAWVQRVRLVLSRLLAENAEELYALHHPYVVDLCCVLLALLDGVELELKGKFPANVATNI

Homo\_sapiens 668 ...SAQFLICDQEPWAFRGLAGLAFORLLPFDGANDIFFOPP  
Rattus\_norvegicus 668 ...SAQFLICDQEPWAFRGLAGLAFORLLPFDGANDIFFOPP  
Mus\_musculus 668 ...SAQFLICDQEPWAFRGLAGLAFORLLPFDGANDIFFOPP  
Caenorhabditis\_elegans 599 FEDF...GSTEERWINQNGFRSETRVRLNVVDDIEVLLSNK  
Drosophila\_melanogaster 739 EGSYTWFSKGWKEAFMSGDQEPWAFRGLAGLAFORLLPFDGANDIFFOPP  
Ostrinia\_furnacalis 757 QGTYTWFSGKWREAFESGAEQEPWAFRGLAGLAFORLLPFDGANDIFFOPP

**b**

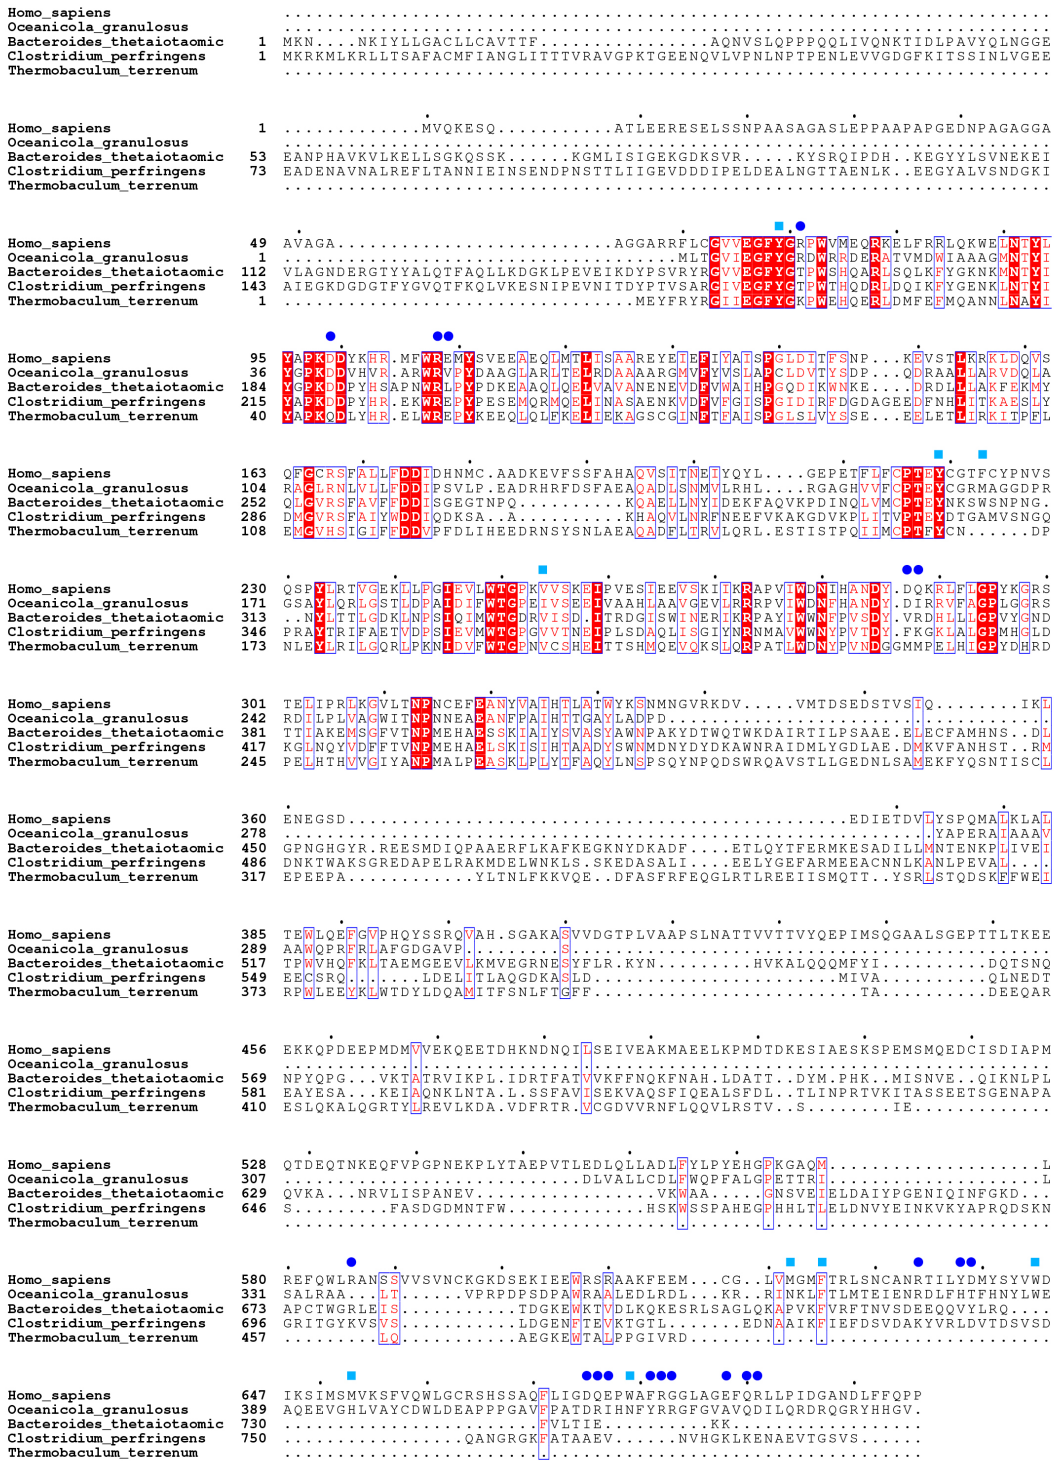

**Supplementary Note 1**

Sequence alignment of OGA proteins to show that residues on the dimerization interface and the substrate-binding cleft are highly conserved in eukaryotes but not in prokaryotes.

(a) Sequence alignment of OGA proteins from representative eukaryotic species: *Homo sapiens* (uniprot: O60502), *Rattus norvegicus* (uniprot: Q8VIJ5), *Mus musculus* (uniprot: Q9EQQ9), *Caenorhabditis elegans* (uniprot: A8WF17), *Drosophila melanogaster* (uniprot: Q9VDC9), and *Ostrinia furnacalis* (uniprot: H9NID4). (b)

Sequence alignment of OGA proteins from human and representative prokaryotic species: *Oceanicola granulosus* (uniprot: Q2CEE3), *Bacteroides thetaiotaomicron* (uniprot: Q89Z12), *Clostridium perfringens* (uniprot: Q0TR53), and *Thermobaculum terrenum* (uniprot: D1CDN2). Variable residues are shown in black with white background, similar residues are shown in red with white background, and conserved residues are shown in white with red background. Residues involved in the dimerization of OGA<sub>cryst</sub> are marked with dark blue dots. Hydrophobic residues on the substrate-binding cleft in close vicinity of the p53 glycopeptide are labeled by light blue squares.



**Supplementary Table 1** A list of polar interactions between OGA $\alpha$  and OGA $\beta$  within 4 Å

| <b>OGA<math>\beta</math></b> | <b>Length (Å)</b> | <b>OGA<math>\alpha</math></b> |
|------------------------------|-------------------|-------------------------------|
| <b>Hydrogen bonds</b>        |                   |                               |
| D99 [O]                      | 3.0               | Y638 [OH]                     |
| D99 [O]                      | 3.0               | R634 [NH1]                    |
| R108 [O]                     | 3.4               | S398 [OG]                     |
| E109 [OE]                    | 2.8               | Y397 [N]                      |
| E109 [OE2]                   | 3.1               | S398 [N]                      |
| D287 [OD2]                   | 2.9               | G683 [N]                      |
| Q288 [NE2]                   | 2.8               | S642 [OG]                     |
| R586 [NE]                    | 2.7               | L692 [O]                      |
| R634 [NH1]                   | 2.9               | D99 [O]                       |
| Y638 [OH]                    | 3.0               | D99 [O]                       |
| Q676 [O]                     | 2.6               | K253 [NZ]                     |
| E677 [OE1]                   | 3.2               | V255 [N]                      |
| E677 [OE2]                   | 3.0               | V254 [N]                      |
| F681 [O]                     | 3.8               | R290 [NH1]                    |
| R682 [O]                     | 3.8               | Q690 [NE2]                    |
| R682 [NH1]                   | 2.9               | Y286 [O]                      |
| G683 [N]                     | 2.8               | D287 [OD2]                    |
| E688 [OE2]                   | 3.2               | L701 [N]                      |
| Q690 [OE1]                   | 2.8               | K289 [NZ]                     |
| <b>Salt bridges</b>          |                   |                               |
| R71 [NH2]                    | 3.2               | D639 [OD1]                    |
| H571 [NE2]                   | 2.7               | E688 [OE1]                    |
| D639 [OD1]                   | 3.0               | R71 [NH2]                     |
| D675 [OD2]                   | 2.8               | K253 [NZ]                     |
| D675 [OD1]                   | 3.8               | K253 [NZ]                     |
| E688 [OE1]                   | 2.7               | H571 [NE2]                    |
| R691 [NE]                    | 3.9               | D696 [OD1]                    |
| R691 [NE]                    | 4.0               | D700 [OD2]                    |
| R691 [NH1]                   | 2.5               | D700 [OD1]                    |
| R691 [NH1]                   | 2.9               | D700 [OD2]                    |



**Supplementary Table 2** Summary of primers used to make OGA mutants in this study

| <b>Primer</b> | <b>Sequence (5'-3')</b>                           |
|---------------|---------------------------------------------------|
| K98A_fwd      | ATACATACTTGTATGCCCCAGCAGATGACTACAAACATAGGATG      |
| K98A_rev      | CATCCTATGTTTGTAGTCATCTGCTGGGGCATACAAGTATGTAT      |
| D174N_fwd     | TGGGTGCAGATCATTTGCTTTGCTTTTTAATGATATAGACCATAATA   |
| D174N_rev     | TATTATGGTCTATATCATTAAAAAGCAAAGCAAATGATCTGCACCCA   |
| D175N_fwd     | GATCATTTGCTTTGCTTTTTGATAATATAGACCATAATATGTGTGCAGC |
| D175N_rev     | CACATATTATGGTCTATATTATCAAAAAGCAAAGCAAATGATCTGCAC  |
| Y219F_fwd     | CTTCTGTCCCACAGAATTCTGTGGCACTTTCTGT                |
| Y219F_rev     | ACAGAAAGTGCCACAGAATTCTGTGGGACAGAAG                |
| F223A_fwd     | CCACAGAATACTGTGGCACTGCCTGTTATCCAAATGTGTCTC        |
| F223A_rev     | GAGACACATTTGGATAACAGGCAGTGCCACAGTATTCTGTGG        |
| W278A_fwd     | TTAAGAGAGCTCCAGTAATCGCGGATAACATTCATGCTAATG        |
| W278A_rev     | CATTAGCATGAATGTTATCCGCGATTACTGGAGCTCTCTTAA        |
| D285A_fwd     | CTGGGATAACATTCATGCTAATGCTTATGATCAGAAGAGACTGTTTC   |
| D285A_rev     | GAAACAGTCTCTTCTGATCATAAGCATTAGCATGAATGTTATCCCAG   |
| W679A_fwd     | GGAGACCAAGAACCCGCGGCCTTTAGAGGTGG                  |
| W679A_rev     | CCACCTCTAAAGGCCGCGGGTTCTTGGTCTCC                  |
